# Supplementary material
Source: PubMed Central journal article supplement (PMC7614373)
Supplement: EMS172347-supplement-Supplementary_Material.pdf [file EMS172347-supplement-Supplementary_Material.pdf]

**Table S1: Brain activity associated with recognition memory and emotional memory**

**A) Main effect of recognition memory (all SH > all CR) across Sleep and Wake groups**

| <b># voxels</b> | <b>T</b> | <b>Z</b> | <b>p(unc)</b> | <b>x,y,z {mm}</b> | <b>region</b>                                |
|-----------------|----------|----------|---------------|-------------------|----------------------------------------------|
| 1349            | 10.0     | 5.9      | 0.00          | 10 -76 -38        | cerebellum                                   |
| 4668            | 9.3      | 5.7      | 0.00          | -42 22 2          | inferior and middle frontal gyrus            |
| 237             | 7.7      | 5.2      | 0.00          | 8 4 -4            | caudate, putamen, and globus pallidus        |
| 1740            | 7.7      | 5.2      | 0.00          | -32 -58 44        | Inferior and superior parietal and precuneus |
| 88              | 5.5      | 4.2      | 0.02          | 20 -58 22         | posterior cingulate                          |
| 358             | 5.4      | 4.2      | 0.00          | -8 24 42          | cingulate and medial frontal gyrus           |
| 355             | 5.2      | 4.1      | 0.00          | -2 -74 48         | superior parietal and precuneus              |
| 91              | 4.7      | 3.8      | 0.02          | -12 12 -6         | caudate, putament, and globus pallidus       |
| 111             | 4.4      | 3.7      | 0.01          | -14 -56 2         | posterior cingulate                          |
| 97              | 4.4      | 3.6      | 0.01          | 14 -50 -2         | posterior cingulate                          |
| 23              | 4.3      | 3.6      | 0.19          | 34 -50 40         | superior and inferior parietal               |
| 13              | 4.3      | 3.6      | 0.32          | 2 -44 -20         | inferior parietal                            |
| 90              | 4.3      | 3.6      | 0.02          | -56 -42 -16       | inferior temporal gyrus                      |
| 21              | 4.1      | 3.4      | 0.21          | -4 -12 8          | thalamus                                     |
| 42              | 4.0      | 3.4      | 0.08          | -22 -62 18        | posterior cingulate                          |

**B) Emotion in source memory (Negative SH > Neutral SH) across Sleep and Wake groups**

| <b># voxels</b> | <b>T</b> | <b>Z</b> | <b>p(unc)</b> | <b>x,y,z {mm}</b> | <b>region</b>         |
|-----------------|----------|----------|---------------|-------------------|-----------------------|
| 621             | 5.9      | 4.5      | 0.00          | -40 -68 40        | inferior parietal     |
| 532             | 5.7      | 4.3      | 0.00          | 0 -46 24          | posterior cingulate   |
| 104             | 5.1      | 4.1      | 0.02          | -54 6 -30         | middle temporal gyrus |

|     |     |     |      |             |                       |
|-----|-----|-----|------|-------------|-----------------------|
| 80  | 4.7 | 3.8 | 0.03 | -12 44 10   | medial frontal gyrus  |
| 43  | 4.6 | 3.8 | 0.11 | 2 -18 38    | cingulate gyrus       |
| 263 | 4.6 | 3.7 | 0.00 | -48 -30 -16 | middle temporal gyrus |
| 10  | 4.2 | 3.5 | 0.43 | -12 56 10   | medial frontal gyrus  |
| 11  | 4.2 | 3.5 | 0.41 | 22 -6 -20   | amygdala              |
| 10  | 3.8 | 3.3 | 0.43 | -62 -40 -14 | middle temporal gyrus |

**Table S1:** Peak responses for (A) recognition memory (all SH > all CR) and (B) emotional memory (negative SH > neutral SH) thresholded at  $p=0.001$  uncorrected, with an extent threshold of  $k=10$  voxels.

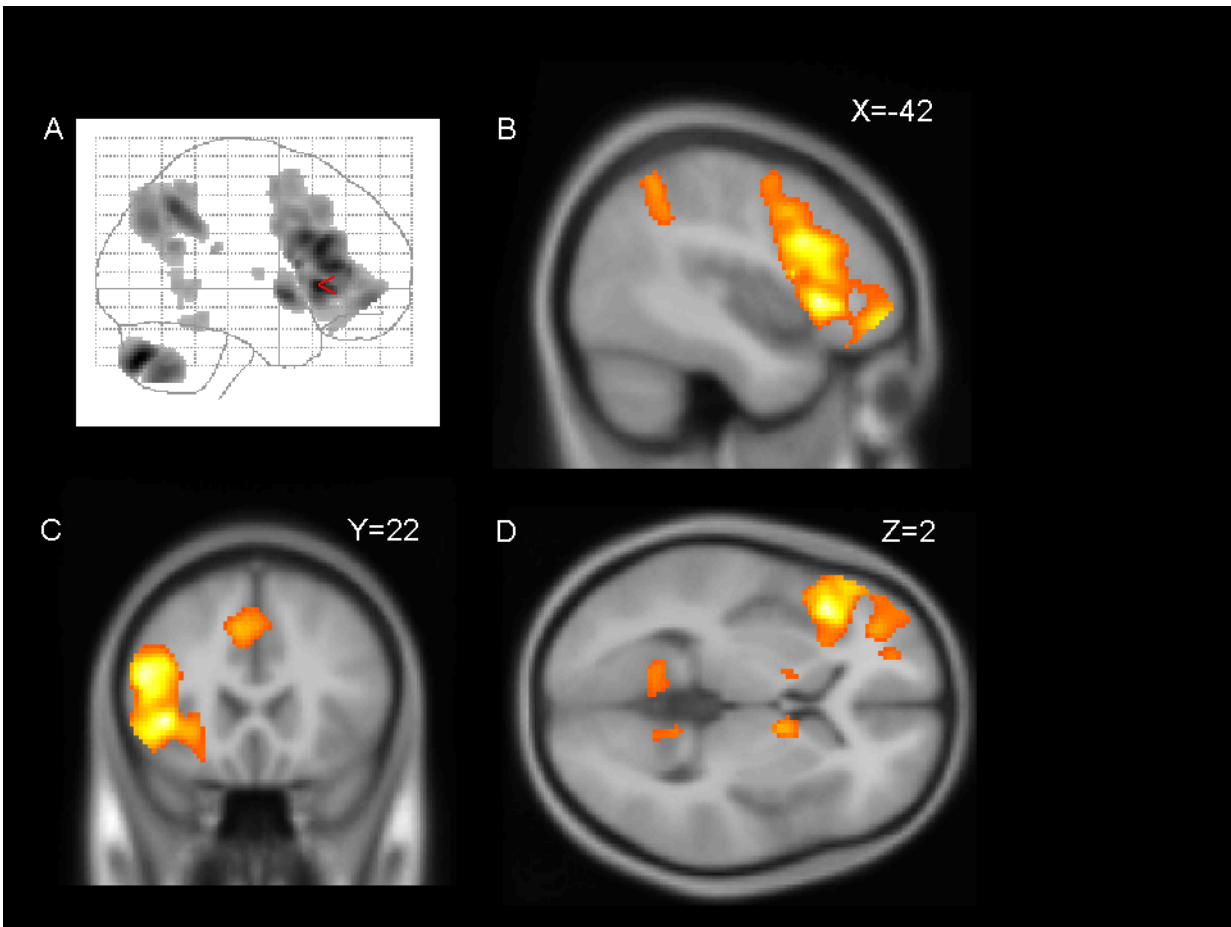

**Figure S1: Main effect of recognition memory.** Shown are (A) a glass brain view of responses to the contrast (all SH > all CR) across both tasks and all participants, (B) the a sagittal view of a large cluster which spreads across inferior, middle, and superior frontal gyri, as well as a separate response spreading across both superior and inferior parietal lobes, (C) a coronal view of the same prefrontal cluster, also showing a response in the anterior cingulate cortex, and (D) an axial view revealing additional activities in the striatum and posterior cingulate bilaterally. Data are rendered onto the 152 MNI brain at a probability threshold of  $P=0.001$  and an extent threshold of  $K=10$  voxels. These results are also shown in **Table S1A**.

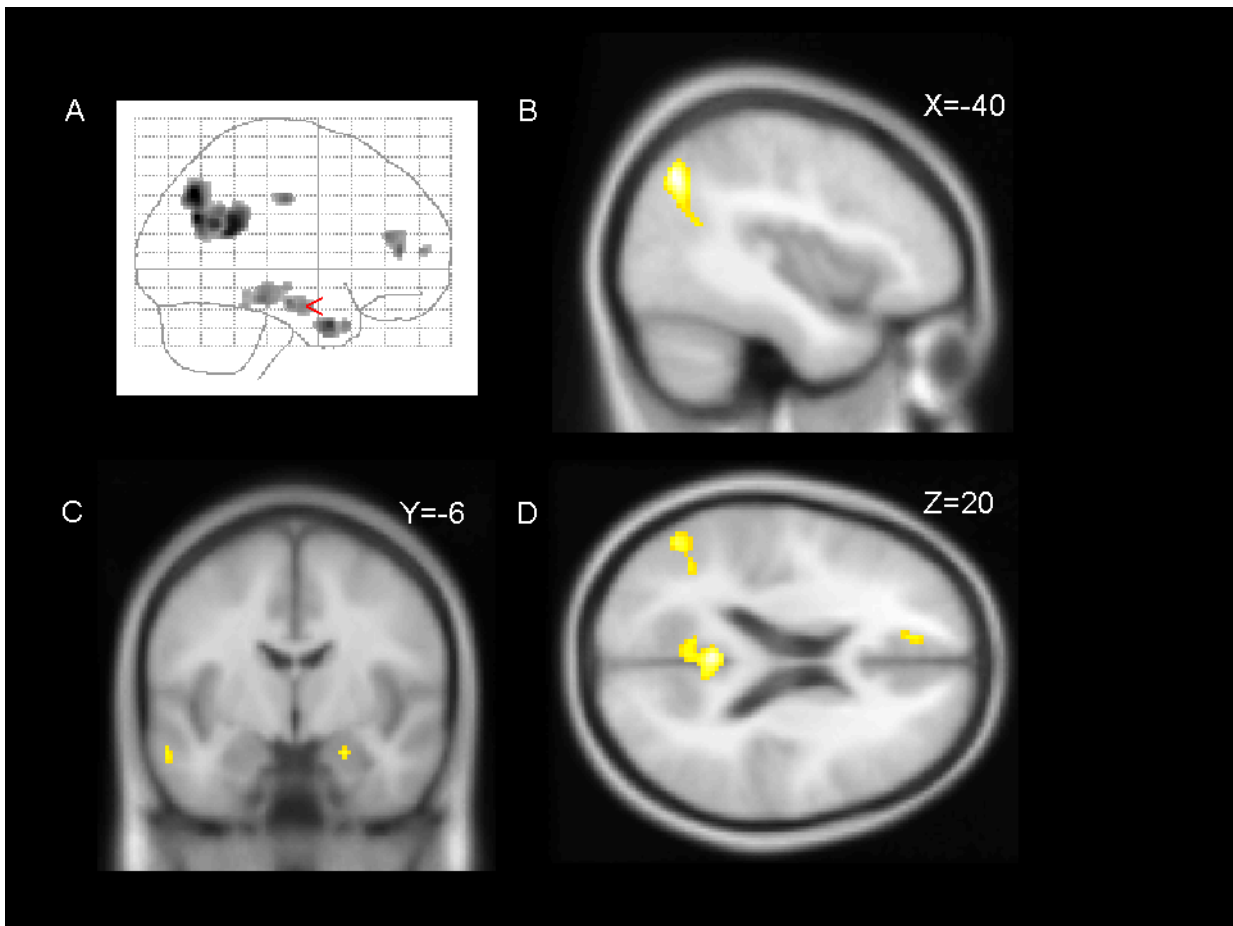

**Figure S2: Main effect of valence upon correct source memory.** The figure shows (A) a glass brain view of responses to the contrast (negative SH > neutral SH) calculated across both tasks and all participants, (B) the sagittal view of responses in the inferior parietal cortex, (C) a coronal view of responses in amygdala and middle temporal gyrus, and (D) an axial view of additional responses in both anterior and posterior cingulate. Data are rendered onto the 152 MNI brain at a probability threshold of  $P=0.001$  and an extent threshold of  $K=10$  voxels. These results are also shown in **Table S1B**.
